1 *Comprehensive analysis of genomic diversity of SARS-CoV-2 in different*  
2 *geographic regions of India: An endeavour to classify Indian SARS-CoV-2*  
3 *strains on the basis of co-existing mutations*

4  
5 <sup>1</sup>Rakesh Sarkar, <sup>1</sup>Suvroto Mitra, <sup>1</sup>Pritam Chandra, <sup>1</sup>Priyanka Saha, <sup>1</sup>Anindita Banerjee,  
6 <sup>1</sup>Shanta Dutta, <sup>1</sup>Mamta Chawla-Sarkar#

7  
8 <sup>1</sup> ICMR-National Institute of Cholera and Enteric Diseases, Kolkata, India.

9 **#Corresponding Author:**

10 Dr. Mamta Chawla-Sarkar

11 Division of Virology

12 National Institute of Cholera and Enteric Diseases

13 P-33, C.I.T. Road, Scheme-XM, Beliaghata

14 Kolkata-700010

15 West Bengal, India

16 Tel. +91-33-2353-7470

17 Fax. + 91-33-2370-5066

18 email: chawlam70@gmail.com; chawlasarkar.m@icmr.gov.in

19

20

21

22

23 **Key words:** Genetic diversity, Geographic distribution, India, SARS-CoV-2, Mutational  
24 analysis, COVID-19

25 **Abstract**

26 Accumulation of mutations within the genome is the primary driving force for viral evolution  
27 within an endemic setting. This inherent feature often leads to altered virulence, infectivity  
28 and transmissibility as well as antigenic shift to escape host immunity, which might  
29 compromise the efficacy of vaccines and antiviral drugs. Therefore, we aimed at genome-  
30 wide analyses of circulating SARS-CoV-2 viruses for the emergence of novel co-existing  
31 mutations and trace their spatial distribution within India. Comprehensive analysis of whole  
32 genome sequences of 441 Indian SARS-CoV-2 strains revealed the occurrence of 33 different  
33 mutations, 21 being distinctive to India. Emergence of novel mutations were observed in S  
34 glycoprotein (7/33), NSP3 (6/33), RdRp/NSP12 (4/33), NSP2 (2/33) and N (2/33). Non-  
35 synonymous mutations were found to be 3.4 times more prevalent than synonymous  
36 mutations. We classified the Indian isolates into 22 groups based on the co-existing  
37 mutations. Phylogenetic analyses revealed that representative strain of each group divided  
38 themselves into various sub-clades within their respective clades, based on the presence of  
39 unique co-existing mutations. India was dominated by A2a clade (55.60%) followed by A3  
40 (37.38%) and B (7%), but exhibited heterogeneous distribution among various geographical  
41 regions. The A2a clade mostly predominated in East India, Western India and Central India,  
42 whereas A3 clade prevailed in South and North India. In conclusion, this study highlights the  
43 divergent evolution of SARS-CoV-2 strains and co-circulation of multiple clades in India.  
44 Monitoring of the emerging mutations would pave ways for vaccine formulation and  
45 designing of antiviral drugs.

46

47

## 48 **1. Introduction**

49 When a virus adapts to a new host within an endemic setting, it needs to exploit the host's  
50 cellular machinery for successful entry, establishing its replication and evading host's  
51 immune responses [1]. To achieve this, viruses try to modify antigenic epitopes on virus  
52 encoded proteins by continuously mutating its genome. As the virus evolves in a stable  
53 environment with minimum selection process, transition mutations are more frequent than the  
54 transversions [2]. Deleterious mutations which may hamper virus's life cycle are filtered out  
55 through natural selection pressure. The mutations which confer some advantage to the virus  
56 persist and evolve further. Thus, digging deep into the nature of mutations can decipher how  
57 selection pressure might be acting on this novel virus.

58 RNA viruses display a characteristic feature of high mutability and with no exception, SARS-  
59 CoV-2 being a positive strand RNA virus has been evolving at a rapid rate since its  
60 emergence in Wuhan during the end of 2019. In the span of six months (December, 2019-  
61 June, 2020), the circulating SARS-CoV-2 strains have accumulated a large number of  
62 mutations which might result in altered virulence, infectivity and transmissibility [3, 4].  
63 Evolutionary behaviour of viruses frequently relies on co-occurrence of multiple mutations in  
64 different genes or within a single gene. Continuous monitoring of these single nucleotide  
65 polymorphisms and locating them to the protein coding genes might help to gain insight into  
66 the genetic diversity of SARS-CoV-2. Accumulation of mutations in other respiratory  
67 viruses, like Influenza have shown to result in generation of vaccine escape mutants or drug

68 resistant mutants leading to continuous need of developing new vaccines or drugs [5]. In the  
69 context of urgent requirement of effective vaccine or antiviral drug against SARS-CoV2, it is  
70 imperative to monitor the evolving mutations in the viral proteins.

71 Hence, this study was designed to analyse and compare the genetic mutations among SARS-  
72 CoV-2 viruses across various geographical regions of India against the prototype ‘Wuhan  
73 strain’ [6]. Establishing an atlas of co-existing mutations across SARS-CoV-2 genome might  
74 underscore their genetic evolution within the various epidemiological settings of India.

## 75 **2. Materials and Methods**

### 76 **2.1. Sequence retrieval**

77 Full genome nucleotide sequences of 441 SARS-CoV-2viruses circulating in India (Mar-May  
78 2020) were retrieved from the GISAID repository [7] (Supplementary Table 1). Several other  
79 clade-specific reference gene sequences of SARS-CoV-2 were also downloaded from  
80 GISAID for construction of the dendrogram.

### 81 **2.2. Screening of mutations and phylogenetic analyses**

82 The novel mutations within the Indian SARS-CoV-2 isolates were analysed with respect to  
83 the prototype strain “Wuhan-Hu-1” (MN908947.3). The phylogenetic dendrogram was  
84 constructed based on the whole genome of 22 representative Indian strains and 10 reference  
85 sequences, using MEGA-version X (Molecular Evolutionary Genetics Analysis), recruiting  
86 the maximum-likelihood statistical method at 500 bootstrap replicates, using the best fit

87 nucleotide substitution model (General Time Reversible). MUSCLE v3.8.31 was used for  
88 multiple sequence alignment. Amino acid sequences were retrieved through TRANSEQ  
89 (Transeq Nucleotide to Protein Sequence Conversion Tool, EMBL-EBI, Cambridgeshire,  
90 UK).

### 91 **3. Results**

#### 92 **3.1. Identification and analyses of various mutations among the SARS-CoV-2 strains** 93 **circulating in different geographical regions of India**

94 To unravel the mutations accumulating through natural selection across SARS-CoV-2  
95 genome, we performed a meticulous whole-genome sequence analysis encompassing 441  
96 Indian SARS-CoV-2 strains deposited in the GISAID repository (Supplementary Figure 1). A  
97 total of 33 different mutations existed among the 441 Indian isolates in comparison to the  
98 prototype strain Wuhan-Hu-1 (mutations those were found in minimum 5 isolates were only  
99 considered). The S protein harboured 8 substitution mutations, of which 6 were non-  
100 synonymous (G21724T/L54F, A21792T/K77M, G21795T/R78M, G23311T/E583D,  
101 A23403G/D614G, G23593T/Q677H) and 2 were synonymous (C22444T/D294D,  
102 C23929T/Y789Y). 7 mutations were found across NSP3 protein: 6 non-synonymous  
103 (G4866T/G716I, C4965T/T749I, C5700A/A994D, A6081G/D1121G, C6310A/S1197R,  
104 C6312A/T1198K) and 1 synonymous mutation (C3037T/F106F). The RdRp/ NSP12, NSP2,  
105 N and NSP4 proteins have acquired 5 (C13730T/A97V, C14408T/P323L, C14425A/L329I,

106 G15451A/G571S, G16078A/V880I), 4 (C884T/R27C, G1397A/V198I, C1707T/S301F,  
107 G1820A/G339S), 3 (T28311C/P13L, C28854T/S194L, GGG28881AAC/RG203KR) and 2  
108 mutations (G8653T/M33I, C8782T/S76S), respectively. Single mutations have been  
109 identified in the 5'-UTR region (C243T), NSP6 (G11083T/L37F), ORF3a (G25563T/Q57H)  
110 and ORF8 (T28144C/L84S) sequences. Rest of the genome was found to be conserved,  
111 having no significant amino acid substitutions. S, NSP3 and NSP12 proteins are found to be  
112 more susceptible to mutations followed by NSP2, N, NSP4, NSP6, ORF3a and ORF8 (Figure  
113 1A). Four mutations-C241T in 5'-UTR (n=242/441), C3037T/F106F in NSP3 (n=241/441),  
114 C14408T/P323L in RdRP (n=240/441), and A23403G/D614G in S (n=239/441)-were found  
115 to predominated mainly in East, West and Central India (Figure 1B). Subsequent leading  
116 mutations were G11083T/L37F in NSP6 (n=163/441), C13730T/A97V in RdRP  
117 (n=160/441), C23929T/Y789Y in S (n=152/441), T28311C/P13L in N (n=158/441) and  
118 C6312A/T1198K in NSP3 (n=144/441), which prevailed mostly across South and North  
119 India (Figure 1B-G). G25563T/Q57H in ORF3a (n=91/441) was the next preponderant  
120 mutation in India, principally Western India, followed by G21724T/L54F and  
121 C22444T/D294D in S (n=54/441 and 40/441, respectively), C28854T/S194L in N  
122 (n=39/441), C6310A/S1197R in NSP3 (n=33/441), T28144C/L84S in ORF8 (n=30/441),  
123 C8782T/S76S in NSP4 (n=30/441) and GGG28881AAC/RG203KR in N (n=28/441) (Figure  
124 1B, D). Maximum amino acid variations were observed in NSP3, NSP4, RdRp, S and N

125 (Figure 1D) genes of strains circulating in Western India, whereas North India exhibited  
126 highest mutations in NSP2 (Figure 1F).

127 **3.2. Emergence of synonymous and non-synonymous mutations: Analysis of nucleotide**  
128 **substitution events (transition and transversion) at the level of codon positions**

129 Analysis of mutational events per sample revealed that maximum number of Indian isolates  
130 harboured 5 mutations followed by 4, 6, 7 and 2 mutations (Figure 2A). Non-synonymous  
131 mutations occurred 3.24 times (1504/463) more frequently than synonymous mutations  
132 (Figure 2B). We have identified 8 nucleotide substitutions: 4 transitions (C>T, A>G, G>A,  
133 T>C) and 4 transversions (G>T, C>A, G>C, A>T) which are responsible for 29 non-  
134 synonymous and 4 synonymous mutations (Figure 2C). C>T transition was the most  
135 prevalent substitution (Figure 2C), occurring predominantly in the second position of the  
136 codon followed by the third position (Figure 2D). On account of C>T transition, 6 non-  
137 synonymous mutations (A97V, P13L, S194L, S301F, T749I) ensued in the second position  
138 of codon, whereas 4 synonymous mutations (D294D, Y789Y, F106F, S76S) occurred in the  
139 third position (Figure 2D). The G>T transversion was the next dominant nucleotide  
140 substitution (occurring frequently in the third position and rarely in the second position of the  
141 codon) which generated 6 (E583D, Q667H, L54F, M33I, L37F, Q57H) and 2 (R78M, S716I)  
142 non-synonymous mutations. The third most prevalent A>G transition occurred solely at the  
143 second position of the codon and was responsible for D614G and D1121G mutations. The  
144 C>A transversion, was seen more frequently in the second position of the codon generating

145 T1198K and A994D mutations, though it did appear occasionally in the first position causing  
146 L329I and S1197R mutations. G>T transversion exclusively occurred in the first position of  
147 the codon (V880I, G671S, V198I and G339S mutations). The co-frequent nucleotide  
148 substitutions, T>C (2nd position) and G>C (1st position of codon) generated the L84S and  
149 G204R mutations. G>A transversion (both in the 2nd and 3rd positions) fostered the R203K  
150 change (Figure 2C-D).

### 151 **3.3. Spatial classification of the Indian SARS-CoV-2 strains based on co-existing** 152 **mutations and their preponderance in different geographical regions across India**

153 On the basis of co-existing mutations, we could classify the 428 Indian isolates into 22  
154 groups, each group representing a different set of co-existing mutations (Figure 3A, Table 1).  
155 Out of 22 groups, 12 groups represented the strains belonging to the A2a clade (most  
156 prevalent) having the clade specific 4 mutations (D614G/S, F106F/NSP3, C241T/5'-UTR  
157 and P323L/RdRp). 11 out of 12 groups have acquired additional mutations (Q57H/ORF3a,  
158 S194L/N, D294D/S, V880I/RdRp, E583D/RdRp, L54F/S, R78M/S, RG203KR/N,  
159 A994D/NSP3, G671S/RdRp, A97V/RdRp, L291I/RdRp) in various combination. The group  
160 having only four characteristic mutations is the most predominant one among A2a clade and  
161 the leading group in India (Figure 3A). The groups with four mutations along with Q57H or  
162 Q57H, S194L and D294D or RG203KR and A994D are moderately dominant among A2a  
163 clade. Eight groups represented the A3 clade bearing L37F mutation along with various  
164 combinations of V198I/NSP2, M33I/NSP4, R27C/NSP2, P13L/Y789Y/S, A97V/RdRp,



165 T1198K/NSP3, S1197R/NSP3, S301F/NSP2, G339S/NSP2, D1121G/NSP3 and K77M/S.  
166 The group having the co-existing mutations like L37F, P13L, Y789Y, A97V and T1198K is  
167 the second most dominant group among A3 clade and second leading group in India. Two  
168 groups represented the strains of B clade having the characteristic L84S/ORF8 and  
169 S76S/NSP4 with or without T749I/NSP3. Overall, India is dominated by A2a (55.60%)  
170 followed by A3 (37.38%) and B (7%) clades (Figure 3B). Geographical distribution revealed  
171 the predominance of A2a clade strains across East, West and Central India; whereas A3 clade  
172 were common in South and North India. The B clade strains have been exclusively reported  
173 from East and West India (Figure 4A-F).

#### 174 **3.4. Phylogenetic analysis of 22 groups of Indian SARS-CoV-2 isolates in comparison to** 175 **the various clade specific strains**

176 The genetic closeness and the clustering pattern of the 22 groups of Indian isolates was  
177 analyzed, by comparing with the various SARS-CoV-2 clade-specific strains and the  
178 prototype clade O strain from Wuhan (MN908947.3). Whole genome sequences of 22  
179 representative Indian strains (one from each of the 22 co-evolving mutant groups) (Table 1)  
180 along with strains denoting 10 different clades were selected for phylogenetic analyses. As  
181 expected, the dendrogram revealed that the 22 isolates clustered with strains of 3 different  
182 clades (12 strains with A2a, followed by 8 with A3 and only 2 with B4-2 clade). The  
183 prototype strain (clade O) belonged to the lineage harbouring A3 and B clade strains. Very  
184 interestingly, the 22 Indian strains, representing different groups, have generated sub-clusters

185 within their respective clades, based on the accumulations of co-existing mutations in  
186 addition to the clade-specific mutations (mentioned on the branches of each lineage) (Figure  
187 5, Table 1). Within the A3 clade, 2 sub-clusters were seen: a (1 strain) and b (6 strains),  
188 bearing 3 (V198I, M33I, R27C) and minimum 4 (P13L, Y789Y/S, A97V, T1198K) co-  
189 existing mutations, respectively in addition to the characteristic L37F mutation. Within clade-  
190 B4-2, only 1 representative strain with T749I mutation in addition to clade-specific L84S and  
191 S76S mutations was observed. Indian strains within clade A2a formed 5 sub-clusters (viz, a-6  
192 strains; b, c, d-1 strain each and e with 2 strains). In addition to the A2a clade-specific 4  
193 mutations (D614G, F106F, C241T P323L); other novel variations like: 1 (Q57H), 1 (A97V),  
194 2 (S716I and I329I), 1 (G671S) and 2 (RG203KR) were revealed in sub-cluster a-e strains,  
195 respectively. All the representative Indian strains had >99% nucleotide sequence homology  
196 among themselves. The prototype strain belonging to the O clade clustered close to the A3  
197 clade (>98% identity).

#### 198 **4. Discussion**

199 During the emergence of SARS-CoV-2 virus in Wuhan, a monophyletic-clade O prevailed.  
200 As the virus spread across the continents, it started accumulating mutations to adapt in  
201 various epidemiological settings. In the present study, we performed a comprehensive  
202 mutational analysis of 441 Indian SARS-CoV-2 strains identified in different geographical  
203 regions of India, and classified them on the basis of co-existing mutations.

204 Our data highlighted the existence of 33 different mutations (32 mutations in 9 different  
205 protein coding genes and 1 in 5'-UTR) among Indian SARS-CoV-2 strains. Maximum

206 number of mutations were detected in S protein (8) followed by NSP3 (7), NSP12 (5), NSP2  
207 (4), N (3) and NSP4 (2). Only single mutation has been observed in 5'-UTR, NSP6, ORF3a  
208 and ORF8 gene segments. Along with 28 non-synonymous mutations, we observed four  
209 silent mutations (D294D/S, F106F/NSP3, S76S/NSP4 and Y789Y/S) which may not have  
210 any apparent effect on protein structure, but may amend codon usage and have repercussion  
211 on translation efficiency [8]. Mutation in the 5'-UTR region may have significant impact on  
212 folding, transcription and replication of viral genome. Comparing the mutation patterns of  
213 India and abroad, we witnessed certain mutations in S (L54F, K77M, R78M, D294D, E583D,  
214 Q677H, Y789Y), NSP3 (G716I, T749I, A994D, D1121G, S1197R, T1198K), RdRP (A97V,  
215 L329I, G571S, V880I), NSP2 (S301F, G339S) and N (P13L, S194L) which are unique to  
216 Indian isolates. D614G/S, a characteristic mutation of A2 clade, has been found to correlate  
217 strongly with the increased case fatality rate [9]. Recent reports also suggested that D614  
218 residue remains embedded in an immuno-dominant linear epitope of S protein and displayed  
219 exaggerated serological response. The D614G mutation has also been established to be  
220 associated with reduced sensitivity of neutralizing antibodies toward S protein [10, 11].  
221 Among the 5 novel non-synonymous mutations in S protein, L54F, K77M and R88M were  
222 found to reside within the NTD domain of S1 subunit and may have significant effect on the  
223 receptor binding ability of S1 subunit [12]. Two mutations E583D and Q677H were observed  
224 in the linker region of S1 and S2 subunits and may influence host protease mediated cleavage  
225 of S1 and S2 subunit during entry of the SARS-CoV-2 [12]. Genomic integrity of SARS-  
226 CoV-2 principally relies on the functional efficiency of the RdRp/NSP12. We observed the  
227 presence of A97V and L329I changes in the NiRaN domain, V880I in the thumb domain and  
228 G571S in the finger domain of RdRp, which could compromise its replication-fidelity and  
229 also alter its sensitivity towards inhibitors like Remdesivir, Ribavirin and Favipiravir which  
230 are recommended for COVID-19 treatment [13]. The S194L mutation resides in the central

231 region of N protein which is essential for its oligomerization [14, 15]. We observed the co-  
232 dominance of 4 mutations (C241T/5'-UTR, D614G/S, F106F/NSP3 and P323L/RdRp) in  
233 India, being most prevalent in the East, West and Central India. This is followed by a group  
234 of 5 co-dominating mutations (L37F/NSP6, T1198K/NSP3, A97V/RdRp, Y789Y/S and  
235 P13L/N), having higher frequency in South and North India.

236 Traditionally, rapidly mutating positive-sense single stranded RNA viruses harbour a higher  
237 transitional load in their genomes than transversions [16]. Consistent with this report, we also  
238 noticed 3.24 times more frequent transitional events over transversion in SARS-CoV-2  
239 genome. Out of 33, 14 mutations were found to be derived from transversions and rest of the  
240 19 mutations originated due to transitions. As transversion events radically change the  
241 properties (size/charge/polarity) of the substituted amino acid, any such mutation in the  
242 coding region could change the protein function. It is not surprising to observe 5 transversion  
243 mutations in S protein because viral capsid proteins often undergo greater number of  
244 mutations leading to altered functions. This might be an immune-elusive viral strategy as  
245 maximum neutralizing antibodies are generated as well as vaccines are designed against the  
246 surface protein epitopes.

247 Digging deep into the nature of mutations we found C>T transition was accountable for 12 of  
248 the 34 reported mutations (considering RG203KR as R203K and G204R) followed by G>T  
249 (8/34), G>A (6/34) and C>A (4/34). Least frequent substitutions were A>G (2/34), A>T  
250 (1/34), T>C (1/34) and G>C (1/34). High frequency of C>T and G>A transitions could drive  
251 from APOBEC (Apolipoprotein B mRNA Editing Catalytic Polypeptide-like), a family of  
252 cytidine deaminase, mediated C to U deamination [17]. Furthermore, maximum C>T changes  
253 have been identified at the 2<sup>nd</sup> position of the codon (harbouring Cs as in GCN [Ala] to GUN  
254 [Val], CCN [Pro] to CUN [Leu], UCN [Ser] to UUN [Leu/Phe], CAN [Thr] to AUN [Ile]),  
255 further underscoring the role of APOBECs which prefers 5'-NCU-3' sites for action [18]. All

256 the synonymous mutations resulted from C>T transitions occurring at 3<sup>rd</sup> position of the  
257 codon. The A>G mutation (responsible for A2 clade specific D614G mutation) and T>C  
258 mutation (responsible for B clade specific L84S mutation) could have arisen as a result of the  
259 ADAR (Adenosine Deaminase Acting on RNA) effect. Thus synthetic inhibitors of APOBEC  
260 and ADAR might prove better amongst the arsenal of anti-SARS-CoV-2 drugs under trial.

261 Since the outbreak in Wuhan, the unceasing accumulation of genetic mutations has driven the  
262 formation of multiple clades and subclades from the prototype clade-O. Congregation of the  
263 two mutations, L84S (T28144C) in ORF8 and S76S (C8782T) in NSP4, led to the emergence  
264 of clade-B; which has been circulating more in North and South America but less in countries  
265 of Africa and Europe. The world's leading A2-clade emerged upon accumulation of three  
266 mutations- D614G (A23403G) in S, F106F (C3037T) in NSP3, and C241T in 5'-UTR. In  
267 contrast to the B clade, A2 clade was the dominant one in Europe, Africa, Asia and Oceania  
268 but was less frequent in North and South America. After inclusion of an additional mutation  
269 P323L (C14408T) in RdRP of A2 clade, a more preponderant sub-clade A2a was established.  
270 A2a clade has most likely originated in Asia, nevertheless, it has rapidly transmitted to  
271 Europe and America and has become the cardinal clade. The A3 clade, having the signature  
272 L37F (G11083T) mutation in NSP6, is distributed maximally within Singapore, Brunei,  
273 Thailand, Indonesia and a few parts of Middle-East including Iraq, Iran and Kyrgyztan [4, 8,  
274 19].

275 In this study, we have observed the heterogeneous distribution of SARS-CoV-2 strains of  
276 three different clades (A2a, A3 and B) in different geographic regions of India. The A2a  
277 clade (55.60%), the leading clade in India, is predominant in West, East and Central India  
278 and but less frequent in North and South India. The A3 clade (37.38%) is India's second most  
279 prevalent clade, largely prevails in North and South India and is less frequent in East, West  
280 and Central India. The B clade (7%), the least frequent one, has been principally reported

281 from East and Western India. We classified the Indian isolates into 22 groups on the basis of  
282 co-existing mutations. 12 groups represented the strains of A2a clade having four common  
283 characteristics mutations along with various amalgamation of novel mutations mostly  
284 associated with ORF3a, RdRp, S and N proteins. 8 groups aligned with A3 clade having  
285 L37F characteristic mutation in concert with several unique mutations typically linked to  
286 nonstructural proteins (NSP2, NSP3, NSP4 and NSP12). 2 groups represented B clade strains  
287 and are found to be associated with the novel mutation T749I/NSP3.

288 The SARS-CoV-2 genome is accumulating mutations at a very high frequency. As suggested  
289 by the ‘mutation-selection balance’ and the ‘speed-fidelity trade-off’ theories [20, 21], this  
290 might be because it has concentrated its endeavours to hasten its replication for increased  
291 host-transmissibility at the cost of accurate replication. This might be advantageous during  
292 adaptation within a heterogeneous population where it is undergoing strong directional  
293 selection pressure due to host immunity [22]. However, other factors governing this response  
294 might be the viral genomic constellation, presence of RNA secondary structures, influence of  
295 host RNA editing enzymes (ADAR and APOBEC) and genetic hitchhiking [23, 24]. Not all  
296 mutations are in favour of the virus. It has been reported that when the beneficial mutations  
297 surpass the detrimental effects of associated deleterious mutations, then the deleterious  
298 mutations are subject to fixation, especially when it is being encoded from the same DNA  
299 [25, 26]. In this case, they are synonymous with respect to all the non-structural proteins  
300 being encoded from ORF 1a and 1b. Though the strain ‘O’ was the first SARS-CoV-2 strain  
301 which was responsible for introduction of SARS-CoV-2 infection in humans, it is being  
302 replaced eventually by its swarm of circulating viral quasispecies [27, 28], at the face of host  
303 immune pressure where the virus is utilising its fast replication strategy to enhance its  
304 propagation.

305 In conclusion, the present study highlights the rapid accumulation of various novel mutations  
306 in several proteins, principally in S glycoprotein and RdRp, that has led to the indigenous  
307 convergent evolution of SARS-CoV-2 circulating in different geographic regions of India.  
308 Presently, vaccine development and RdRp inhibitors based therapies are being targeted to  
309 control this global pandemic situation. However, for successful therapeutics, it would be  
310 imperative to monitor the mutations in targeted genes. This study has provided the much  
311 needed information regarding the novel mutations in S, RdRp and several other non-  
312 structural proteins, which could pave ways for vaccine formulation and for designing of  
313 antiviral drugs targeting specific viral proteins.

#### 314 **Conflict of interest:**

315 The authors declare that no conflict of interest exists.

#### 316 **Acknowledgement:**

317 The study was supported by Indian Council of Medical Research, India. RS is supported by  
318 Senior Research Fellowship from UGC. The authors acknowledge The hard work of  
319 scientists and laboratory staffs in all the COVID-19 testing laboratories and Next gen  
320 sequencing labs across India.

321 **Funding:** This research did not receive any specific grant from funding agencies in the  
322 public, commercial, or not-for-profit sectors.

323

#### 324 **References:**

- 325 1. Sackman AM, McGee LW, Morrison AJ, et al. Mutation-Driven Parallel Evolution  
326 during Viral Adaptation. *Mol Biol Evol.* 2017;34(12):3243-3253.
- 327 2. Barr, J. N., and R. Fearn. "Genetic Instability of RNA Viruses." *Genome Stability.*  
328 Academic Press, 2016. 21-35.

- 329 3. Maitra A, Sarkar MC, Raheja H, Biswas NK, Chakraborti S, Singh AK, Ghosh S,  
330 Sarkar S, Patra S, Mondal RK, Ghosh T. Mutations in SARS-CoV-2 viral RNA  
331 identified in Eastern India: Possible implications for the ongoing outbreak in India  
332 and impact on viral structure and host susceptibility. *J. Biosci.* 2020;45(1).
- 333 4. Gomez-Carballa A, Bello X, Pardo-Seco J, Martinon-Torres F, Salas A. The impact  
334 of super-spreaders in COVID-19: mapping genome variation worldwide. *bioRxiv*  
335 097410 (Preprints) 2020. [Cited June 30, 2020]. Available from:  
336 <https://www.biorxiv.org/content/10.1101/2020.05.19.097410v3.full>.
- 337 5. Du X, Wang Z, Wu A, Song L, Cao Y, Hang H, Jiang T. Networks of genomic co-  
338 occurrence capture characteristics of human influenza A (H3N2) evolution. *Genome*  
339 *research.* 2008 Jan 1;18(1):178-87.
- 340 6. Wu D, Wu T, Liu Q, Yang Z. The SARS-CoV-2 outbreak: What we know. *Int J*  
341 *Infect Dis.* 2020;94:44-48.
- 342 7. Shu, Y., McCauley, J. (2017) GISAID: Global initiative on sharing all influenza data  
343 – from vision to reality. *EuroSurveillance*, 22(13).
- 344 8. Mercatelli, D.; Giorgi, F.M. Geographic and Genomic Distribution of SARS-CoV-2  
345 Mutations. *Preprints* 2020, 2020040529. doi: 10.20944/preprints202004.0529.v1.
- 346 9. Becerra-Flores M, Cardozo T. SARS-CoV-2 viral spike G614 mutation exhibits  
347 higher case fatality rate [published online ahead of print, 2020 May 6]. *Int J Clin*  
348 *Pract.* 2020;e13525.
- 349 10. Korber B, Fischer W, Gnanakaran SG, Yoon H, Theiler J, Abfalterer W, Foley B,  
350 Giorgi EE, Bhattacharya T, Parker MD, Partridge DG. Spike mutation pipeline  
351 reveals the emergence of a more transmissible form of SARS-CoV-2. *bioRxiv*  
352 069054v2 (Preprints) 2020. [Cited June 30, 2020]. Available from:  
353 <https://www.biorxiv.org/content/10.1101/2020.04.29.069054v2.full>
- 354 11. Hu J, He CL, Gao Q, Zhang GJ, Cao XX, Long QX, Deng HJ, Huang LY, Chen J,  
355 Wang K, Tang N. The D614G mutation of SARS-CoV-2 spike protein enhances viral  
356 infectivity and decreases neutralization sensitivity to individual convalescent sera.  
357 *bioRxiv* 161323v1 (Preprints) 2020. [Cited June 30, 2020]. Available from:  
358 <https://www.biorxiv.org/content/10.1101/2020.06.20.161323v1.full>
- 359 12. Wang Q, Zhang Y, Wu L, et al. Structural and Functional Basis of SARS-CoV-2  
360 Entry by Using Human ACE2. *Cell.* 2020;181(4):894-904.e9.
- 361 13. Kirchdoerfer RN, Ward AB. Structure of the SARS-CoV nsp12 polymerase bound to  
362 nsp7 and nsp8 co-factors. *Nat. Commun.* 2019 May 28;10(1):1-9.



- 363 14. Yu IM, Oldham ML, Zhang J, Chen J. Crystal structure of the severe acute respiratory  
364 syndrome (SARS) coronavirus nucleocapsid protein dimerization domain reveals  
365 evolutionary linkage between corona-and arteriviridae. *J. Biol. Chem.* 2006 Jun  
366 23;281(25):17134-9.
- 367 15. Zhao P, Cao J, Zhao LJ, Qin ZL, Ke JS, Pan W, Ren H, Yu JG, Qi ZT. Immune  
368 responses against SARS-coronavirus nucleocapsid protein induced by DNA vaccine.  
369 *Virology.* 2005 Jan 5;331(1):128-35.
- 370 16. Sanjuán R, Domingo-Calap P. Mechanisms of viral mutation. *Cell Mol Life Sci.* 2016  
371 Dec 1;73(23):4433-48.
- 372 17. Di Giorgio S, Martignano F, Torcia MG, Mattiuz G, Conticello SG. Evidence for  
373 host-dependent RNA editing in the transcriptome of SARS-CoV-2. *Sci. Adv.* 2020  
374 May 18:eabb5813.
- 375 18. Rosenberg BR, Hamilton CE, Mwangi MM, Dewell S, Papavasiliou FN.  
376 Transcriptome-wide sequencing reveals numerous APOBEC1 mRNA-editing targets  
377 in transcript 3' UTRs. *Nat Struct Mol Biol* 2011 Feb;18(2):230.
- 378 19. Gonzalez-Reiche AS, Hernandez MM, Sullivan MJ, Ciferri B, Alshammary H, Obla  
379 A, Fabre S, Kleiner G, Polanco J, Khan Z, Albuquerque B. Introductions and early  
380 spread of SARS-CoV-2 in the New York City area. *Science.* 2020 May 29.
- 381 20. Regoes RR, Hamblin S, Tanaka MM. Viral mutation rates: modelling the roles of  
382 within-host viral dynamics and the trade-off between replication fidelity and speed. *P*  
383 *Roy Soc B-Biol Sci* 2013 Jan 7;280(1750):20122047.
- 384 21. Fitzsimmons WJ, Woods RJ, McCrone JT, Woodman A, Arnold JJ, Yennawar M,  
385 Evans R, Cameron CE, Lauring AS. A speed–fidelity trade-off determines the  
386 mutation rate and virulence of an RNA virus. *PLoS Biol.* 2018 Jun  
387 28;16(6):e2006459.
- 388 22. Duffy S. Why are RNA virus mutation rates so damn high?. *PLoS Biol.* 2018 Aug  
389 13;16(8):e3000003.
- 390 23. Sanjuán R, Thoulouze MI. Why viruses sometimes disperse in groups. *Virus Evol.*  
391 2019 Jan;5(1):vez014.
- 392 24. Combe M, Sanjuan R. Variation in RNA virus mutation rates across host cells. *PLoS*  
393 *Pathog.* 2014 Jan 23;10(1):e1003855.
- 394 25. Zanini F, Neher RA. Quantifying selection against synonymous mutations in HIV-1  
395 env evolution. *J Virol.* 2013 Nov 1;87(21):11843-50.

- 396 26. Stern A, Bianco S, Te Yeh M, Wright C, Butcher K, Tang C, Nielsen R, Andino R.  
397 Costs and benefits of mutational robustness in RNA viruses. *Cell Rep.* 2014 Aug  
398 21;8(4):1026-36.
- 399 27. Silander OK, Tenaillon O, Chao L. Understanding the evolutionary fate of finite  
400 populations: the dynamics of mutational effects. *PLoS Biol.* 2007 Apr 3;5(4):e94.
- 401 28. Peck KM, Lauring AS. Complexities of viral mutation rates. *J Virol.* 2018 Jul  
402 15;92(14).

403

#### 404 **Figure legends**

405 **Figure 1(A-B):** Identification of various mutations present in the genome of SARS-CoV-2  
406 circulating in India. (A) Pictorial presentation of 33 different mutations (represented at the  
407 level of nucleotide as well as amino acid) found in different regions (coding and non-coding  
408 regions) of SARS-CoV-2 genome. (B) Relative frequencies of 33 different mutations in  
409 India.

410 **Figure 1(C-G):** Identification of various mutations present in the genome of SARS-CoV-2  
411 circulating in different geographic regions in India. Relative frequencies of various mutations  
412 in (C) East India, (D) Western India, (E) South India, (F) Central India and (G) North India.

413 **Figure 2:** Analysis of synonymous and non-synonymous mutations regarding nucleotide  
414 substitutions at different positions of codon. (A) Frequency distribution of SARS-CoV-2  
415 isolates harbouring varying numbers of co-existing mutations. (B) Prevalence of synonymous  
416 and non-synonymous mutations in SARS-CoV-2 genomes across India. (C) Frequency  
417 distribution of various transitional (C>T, A>G, G>A and T>C) and transversional (G>T,  
418 C>A, G>C and A>T) substitution events. (D) Frequency distribution of various types of  
419 substitutional events occurred at different nucleotide positions (1<sup>st</sup>, 2<sup>nd</sup> and 3<sup>rd</sup>) of the codon.

420 **Figure 3:** Grouping of SARS-CoV-2 strains on the basis of co-existing mutations and  
421 analysis of their prevalence. (A) Mutational analysis revealed the presence of the three clade

422 (A2a, A3 and B) specific SARS-CoV-2 strains in India. Accumulation of novel mutations in  
423 addition to clade specific changes directed us to classify A2a clade strains into 12 groups, A3  
424 clade strains into 8 groups and B clade strains into 2 groups. We also shown the number of  
425 strains belonging to each group. (B) Prevalence of three clade specific mutations in India.  
426 A2a clade (55.60%) was found to be most prevalent in India, followed by A3 (37.38%) and B  
427 (7%).

428 **Figure 4 (A-C):** Prevalence of three different clades (A2a, A3 and B) and their sub groups in  
429 different geographic regions in India. Frequency distribution of strains belonging to each  
430 groups of three different clades in (A) East India, (B) Western India and (C) South India,

431 **Figure 4 (D-F):** Prevalence of three different clades (A2a, A3 and B) and their sub groups in  
432 different geographic regions in India. Frequency distribution of strains belonging to each  
433 groups of three different clades in (D) Central India and (E) North India. (F) Prevalence of  
434 three different clades in different geographic regions of India.

435 **Figure 5:** Molecular phylogenetic analysis by maximum likelihood method. Phylogenetic  
436 dendrogram based on whole genome sequences of 22 representative strains from 22 different  
437 groups along with 9 clade specific known strains and the prototype O-clade strain  
438 (MN908947.3). 22 representative strains have been marked with star (\*). Scale bar was set at  
439 0.00005 nucleotide substitution per site. Bootstrap values of less than 70% are not shown.  
440 The best fit model used for constructing the phylogenetic dendrogram was General Time  
441 Reversible Model (GTR).

442 **Supplementary Figure 1:** Pie chart representation of strains from different geographic  
443 region taken into consideration for mutation analysis. States belong to each such region and  
444 numbers of strains taken are mentioned as well.

Fig. 1A

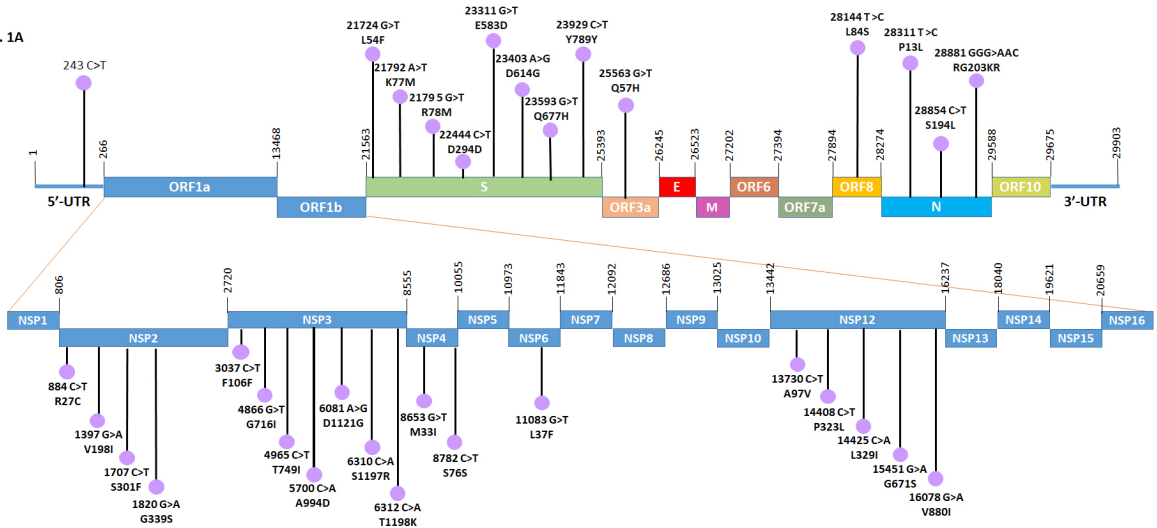

Fig. 1B

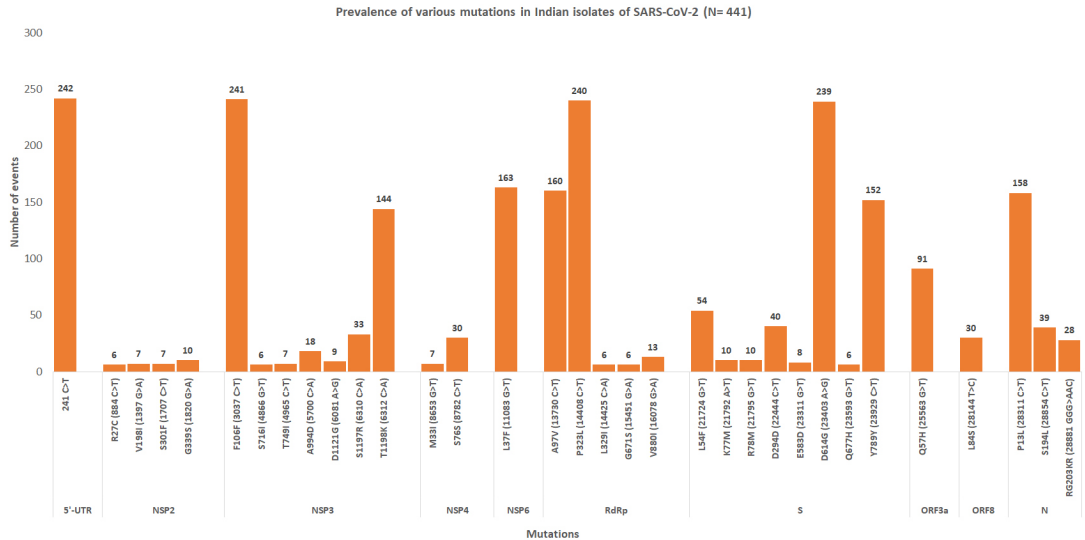

Figure 1 : Continued

Fig. 1C

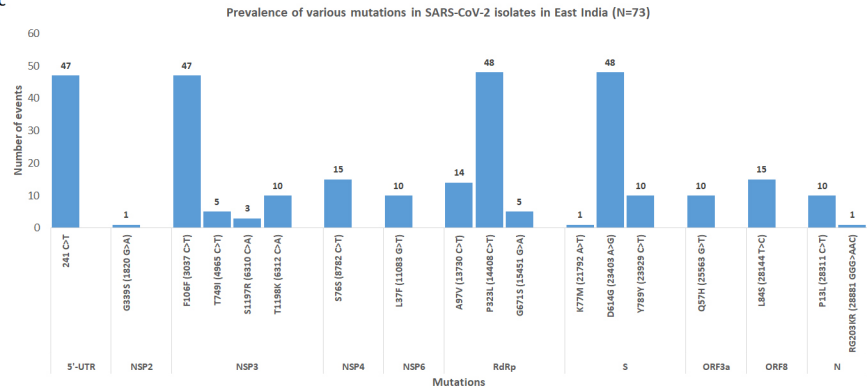

Fig. 1D

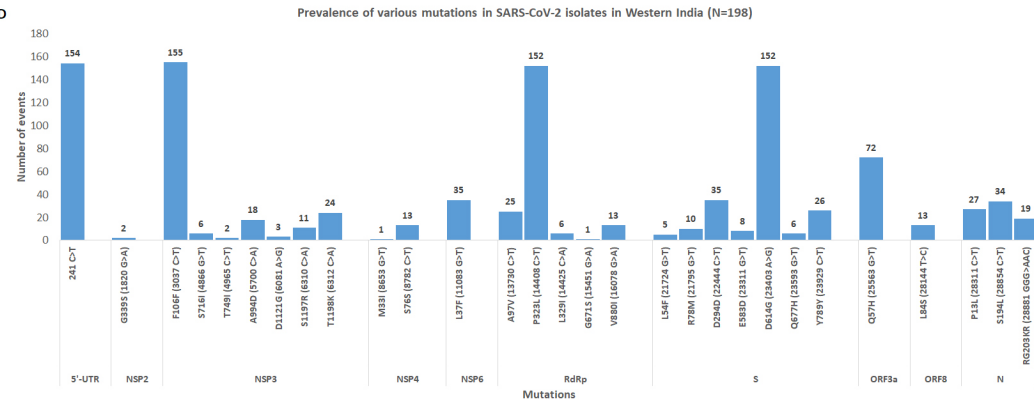

Fig. 1E

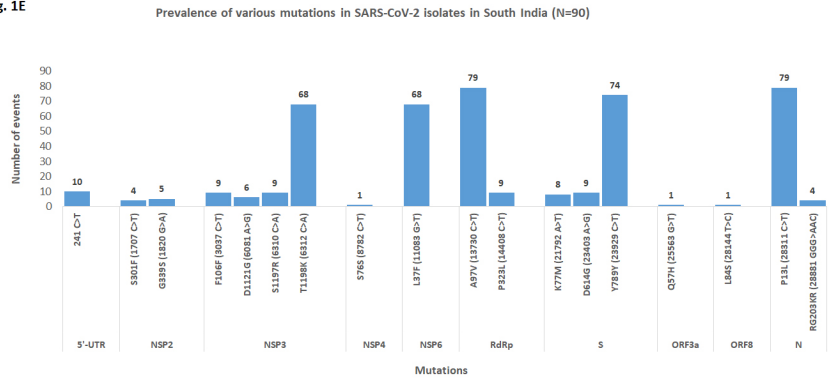

Fig. 1F

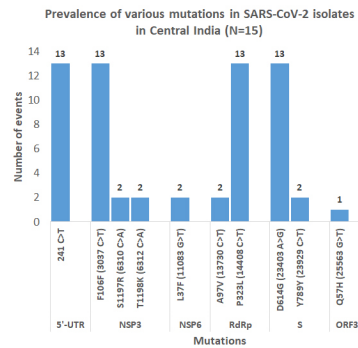

Fig. 1G

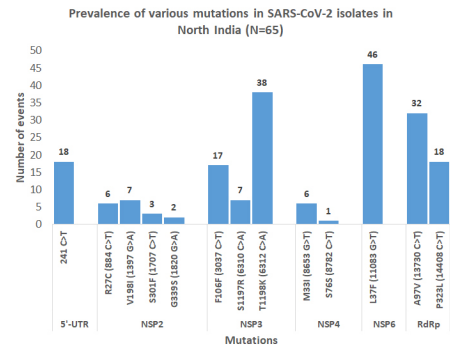

Figure 1

Fig. 2A

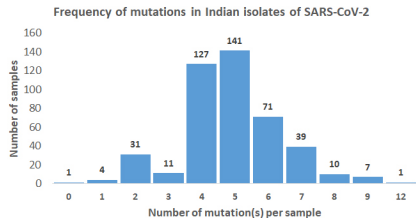

Fig. 2B

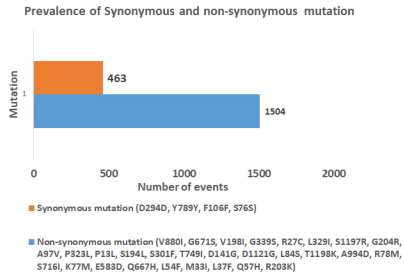

Fig. 2C

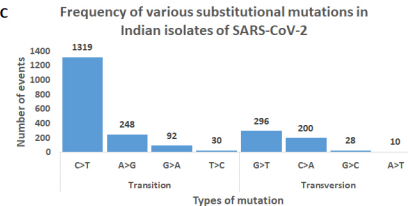

Fig. 2D

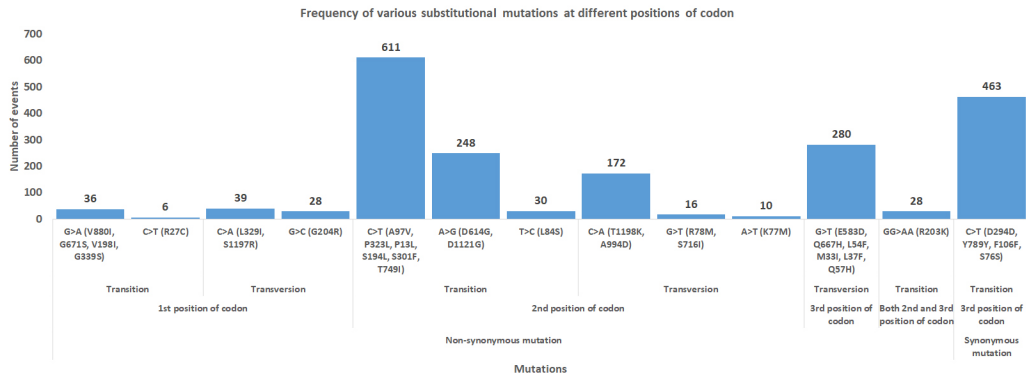

Figure 2

**Fig. 3A**

Prevalence of SARS-CoV-2 with various co-existing mutations in India (N= 428/441)

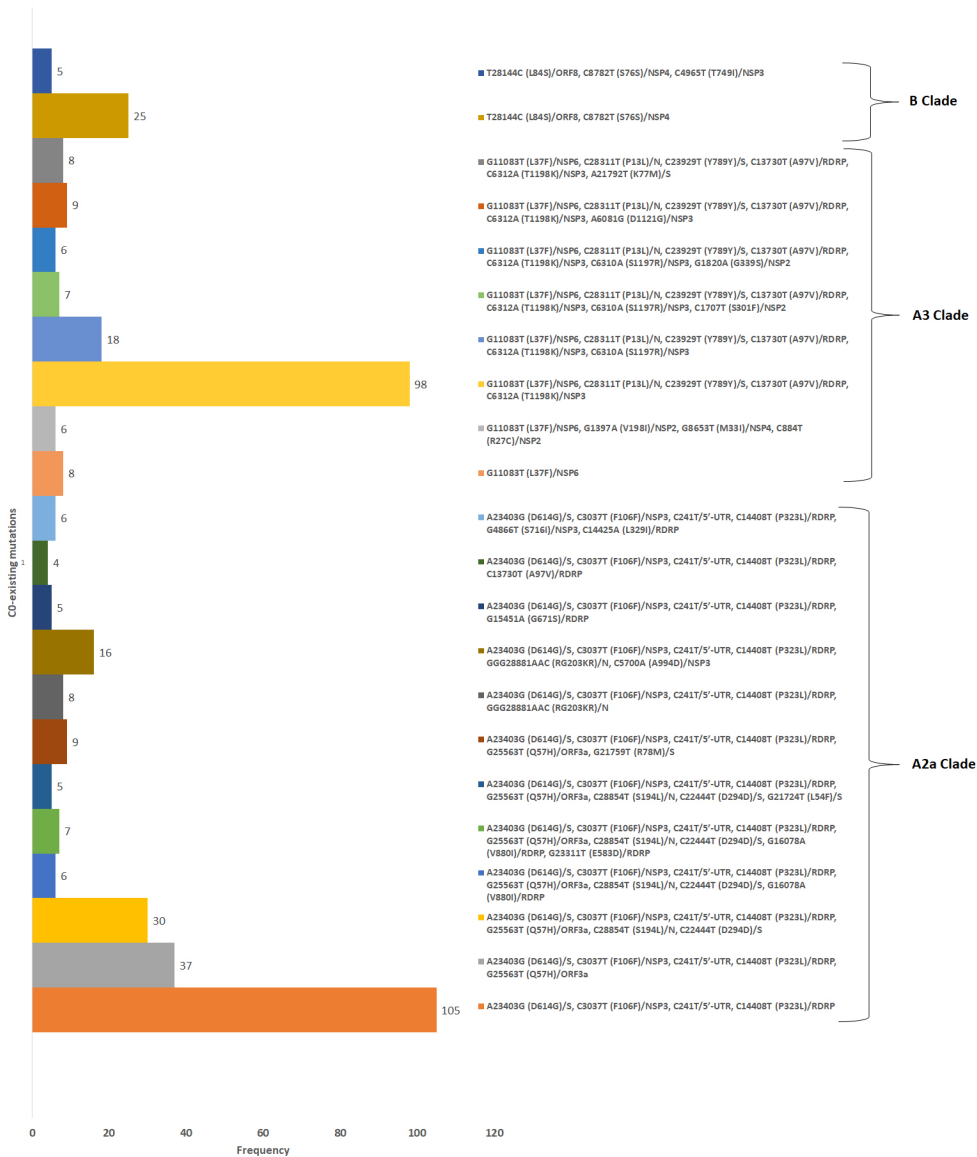

**Fig. 3B**

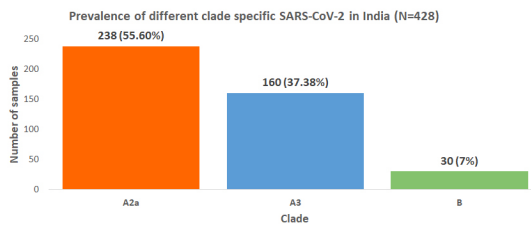

**Figure 3**

Fig. 4A

Prevalence of SARS-CoV-2 with various co-existing mutations in East India (N= 73/73)

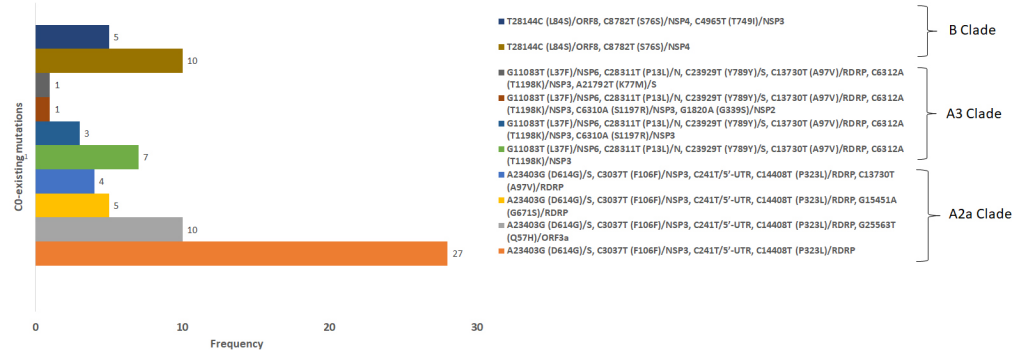

Fig. 4C

Prevalence of SARS-CoV-2 with various co-existing mutations in South India (N= 78/90)

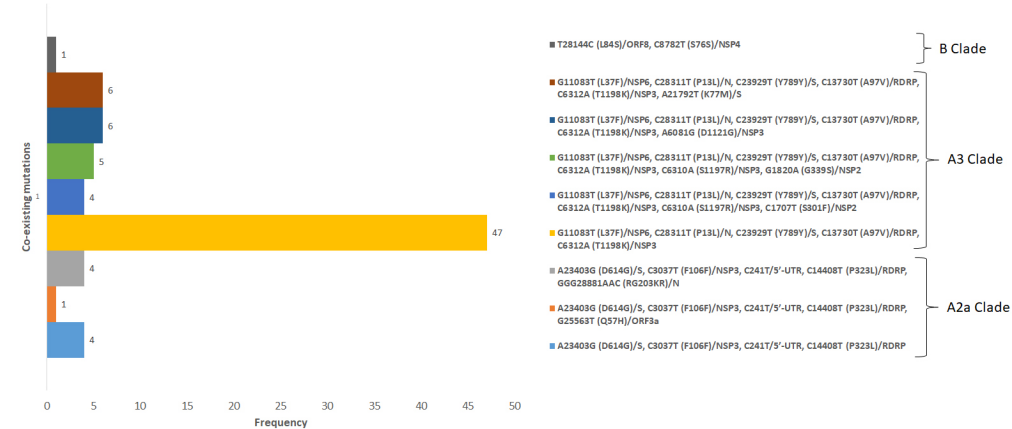

Fig. 4B

Prevalence of SARS-CoV-2 with various co-existing mutations in Western India (N= 197/198)

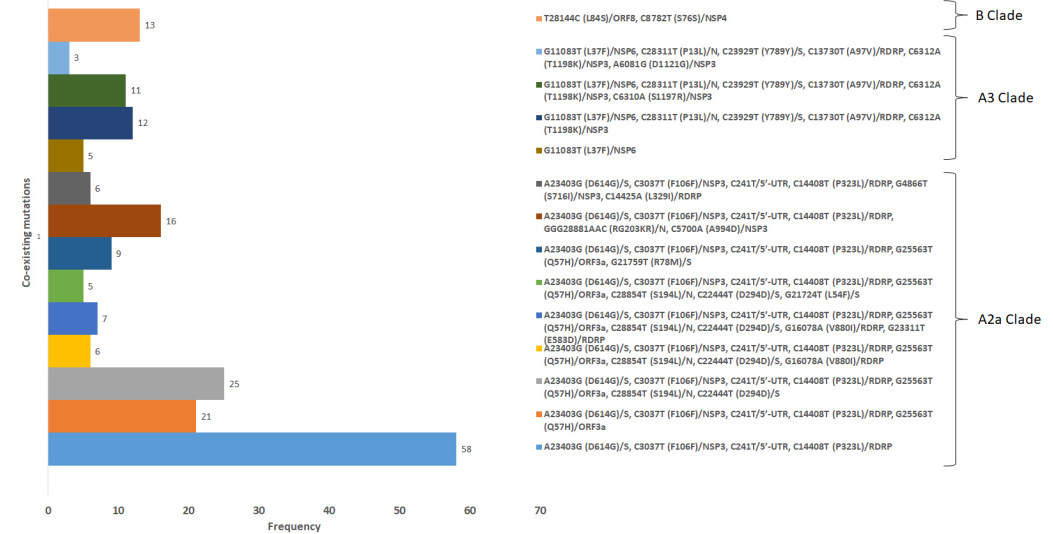



Fig. 4D

Prevalence of SARS-CoV-2 with various co-existing mutations in Central India (N= 15/15)

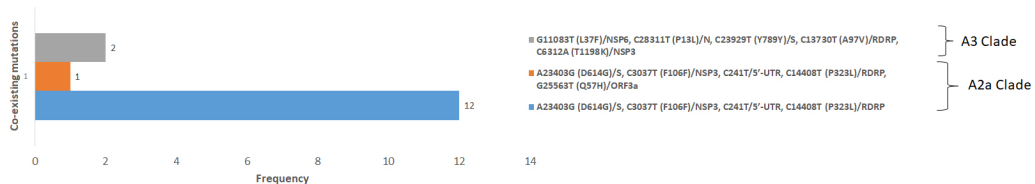

Fig. 4E

Prevalence of SARS-CoV-2 with various co-existing mutations in North India (N= 65/65)

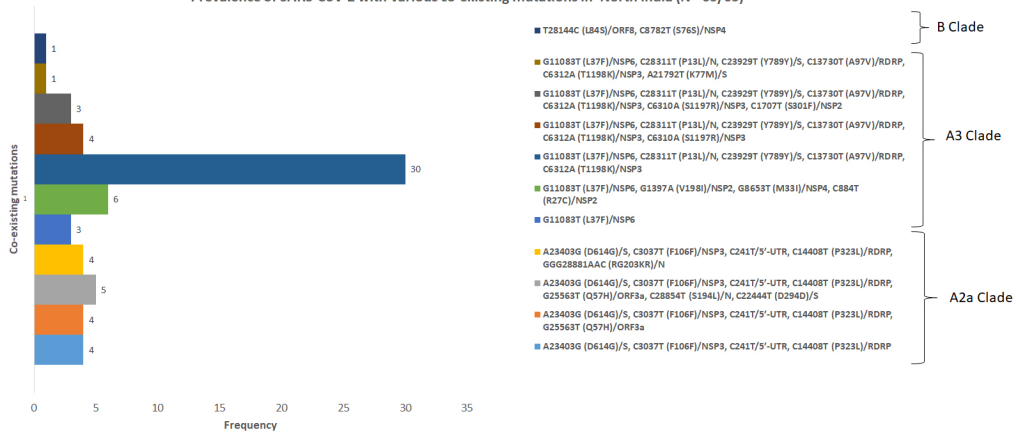

Fig. 4F

Prevalence of various clade specific SARS-CoV-2 in different geographic region of India

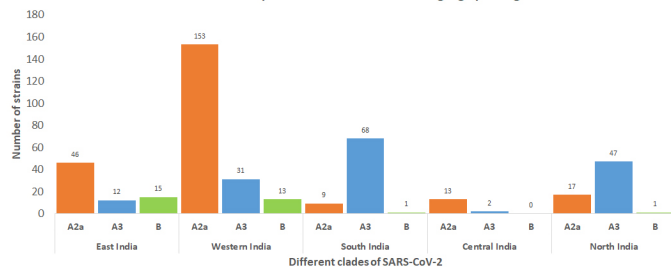

Figure 4

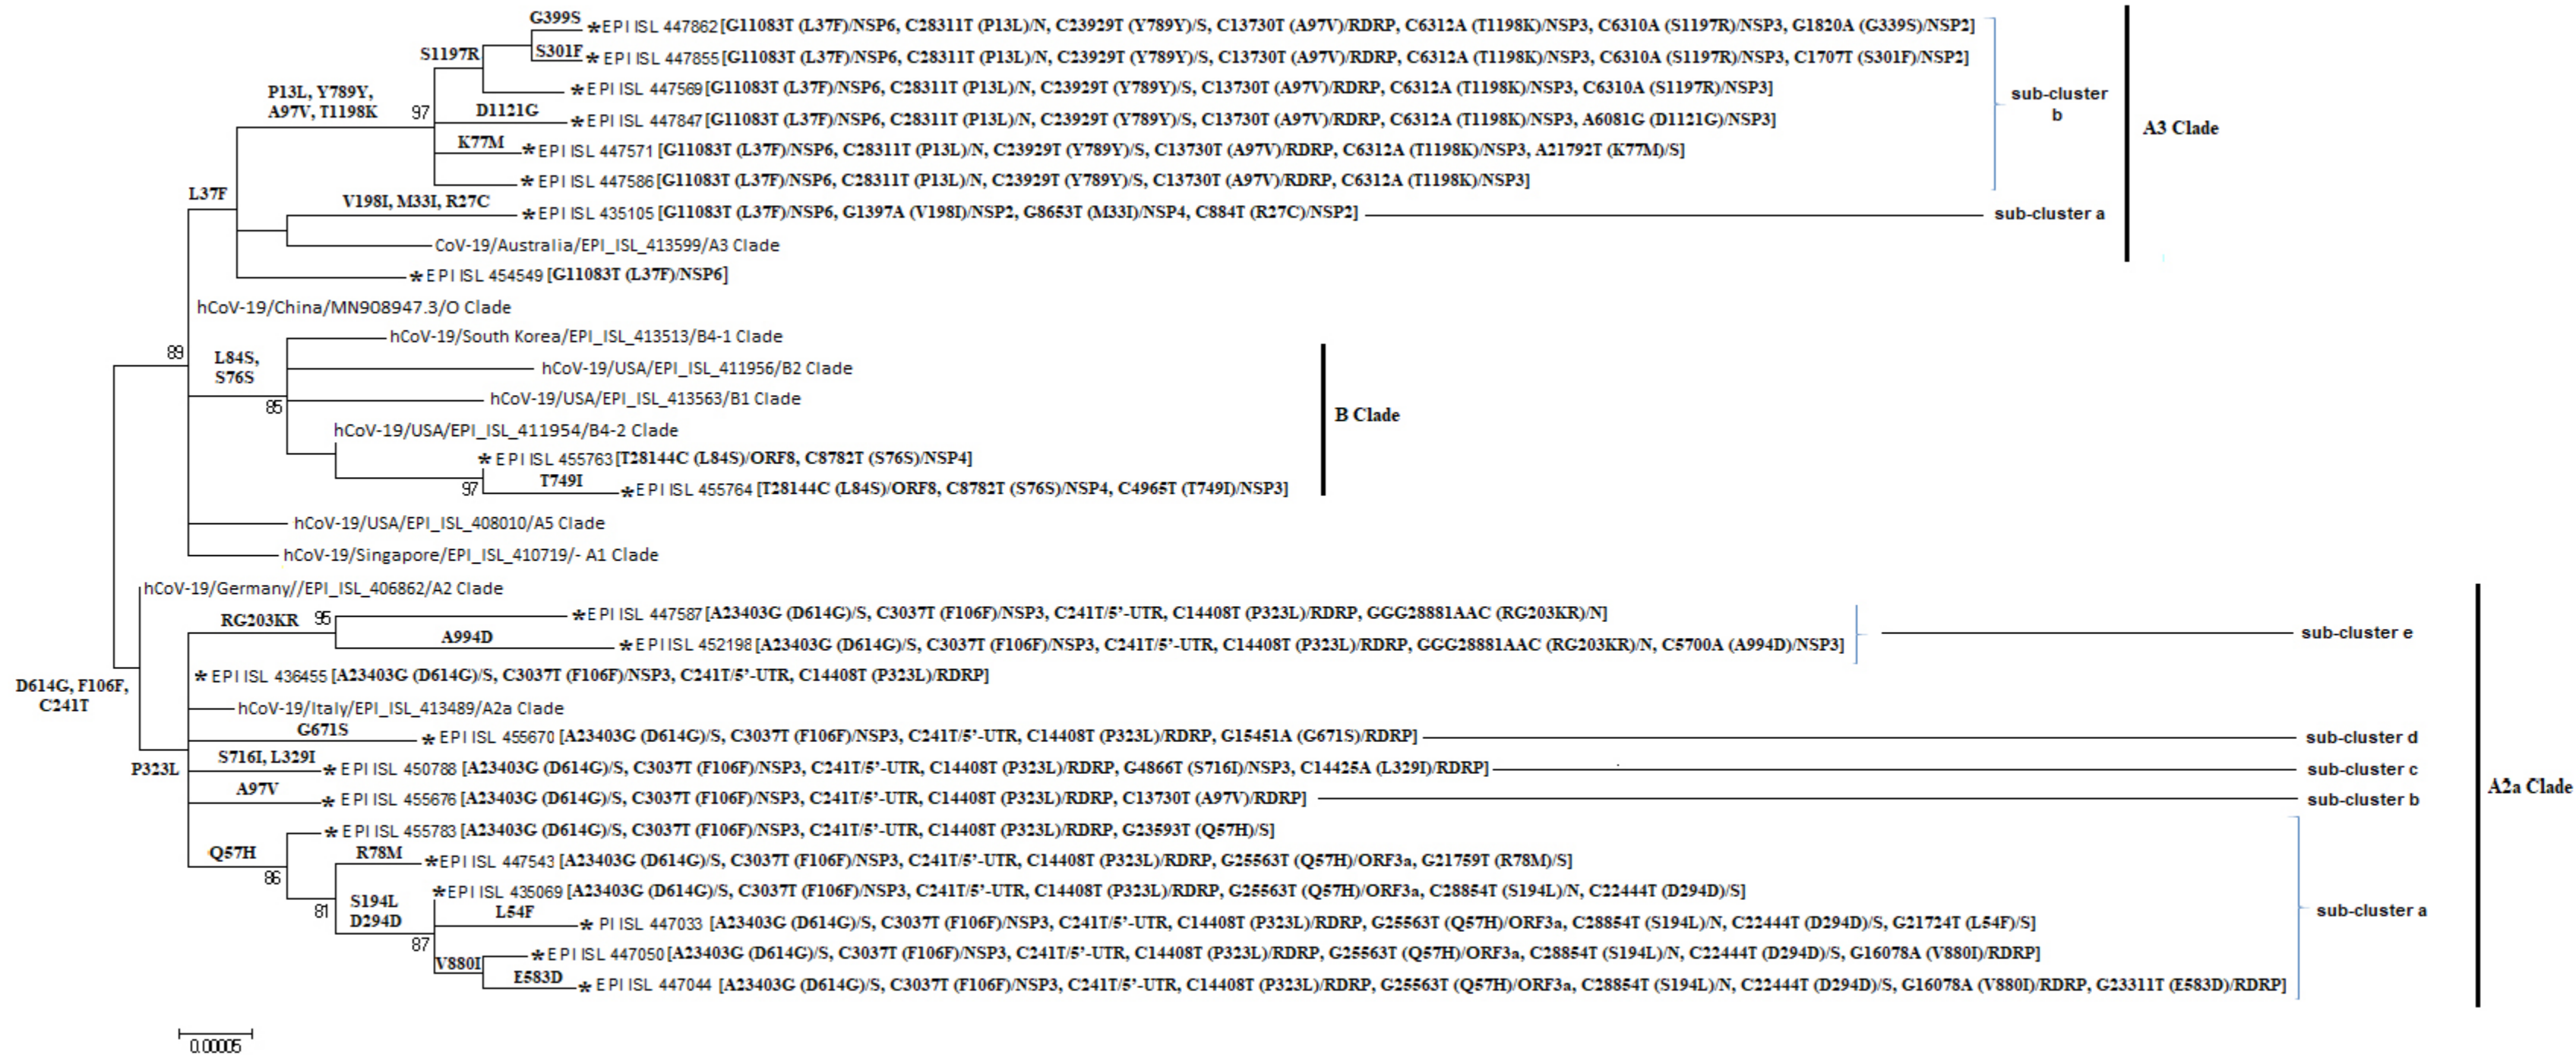

Figure 5

Distribution of SARS-CoV-2 strains (N= 441) , taken into mutational analysis, in different geographic regions of India

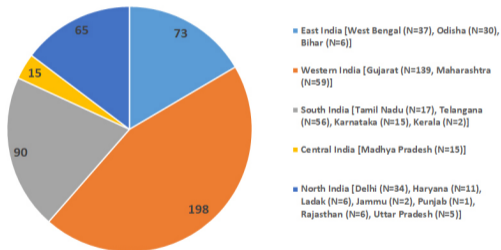

Supplimentary Figure 1

**Table 1.** List of accession numbers of representative strains of 22 groups of SARS-CoV-2.

| Sl. No. | 22 groups of SARS-CoV-2, classified on the basis of co-existing mutations                                                                                                          | Sequence Accession Number | Clade         | Sub-cluster/Sub-clade |
|---------|------------------------------------------------------------------------------------------------------------------------------------------------------------------------------------|---------------------------|---------------|-----------------------|
| 1       | A23403G (D614G)/S, C3037T (F106F)/NSP3, C241T/5'-UTR, C14408T (P323L)/RDRP                                                                                                         | EPI_ISL_436455            | A2a Clade     | Proto type            |
| 2       | A23403G (D614G)/S, C3037T (F106F)/NSP3, C241T/5'-UTR, C14408T (P323L)/RDRP, G23593T (Q57H)/ORF3a                                                                                   | EPI_ISL_455783            |               | Sub-cluster a         |
| 3       | A23403G (D614G)/S, C3037T (F106F)/NSP3, C241T/5'-UTR, C14408T (P323L)/RDRP, G25563T (Q57H)/ORF3a, C28854T (S194L)/N, C22444T (D294D)/S                                             | EPI_ISL_435069            |               | Sub-cluster a         |
| 4       | A23403G (D614G)/S, C3037T (F106F)/NSP3, C241T/5'-UTR, C14408T (P323L)/RDRP, G25563T (Q57H)/ORF3a, C28854T (S194L)/N, C22444T (D294D)/S, G16078A (V880D)/RDRP                       | EPI_ISL_447050            |               | Sub-cluster a         |
| 5       | A23403G (D614G)/S, C3037T (F106F)/NSP3, C241T/5'-UTR, C14408T (P323L)/RDRP, G25563T (Q57H)/ORF3a, C28854T (S194L)/N, C22444T (D294D)/S, G16078A (V880D)/RDRP, G23311T (E583D)/RDRP | EPI_ISL_447044            |               | Sub-cluster a         |
| 6       | A23403G (D614G)/S, C3037T (F106F)/NSP3, C241T/5'-UTR, C14408T (P323L)/RDRP, G25563T (Q57H)/ORF3a, C28854T (S194L)/N, C22444T (D294D)/S, G21724T (L54F)/S                           | EPI_ISL_447033            |               | Sub-cluster a         |
| 7       | A23403G (D614G)/S, C3037T (F106F)/NSP3, C241T/5'-UTR, C14408T (P323L)/RDRP, G25563T (Q57H)/ORF3a, G21759T (R78M)/S                                                                 | EPI_ISL_447543            |               | Sub-cluster a         |
| 8       | A23403G (D614G)/S, C3037T (F106F)/NSP3, C241T/5'-UTR, C14408T (P323L)/RDRP, GGG28881AAC (RG203KR)/N                                                                                | EPI_ISL_447587            |               | Sub-cluster e         |
| 9       | A23403G (D614G)/S, C3037T (F106F)/NSP3, C241T/5'-UTR, C14408T (P323L)/RDRP, GGG28881AAC (RG203KR)/N, C5700A (A994D)/NSP3                                                           | EPI_ISL_452198            |               | Sub-cluster e         |
| 10      | A23403G (D614G)/S, C3037T (F106F)/NSP3, C241T/5'-UTR, C14408T (P323L)/RDRP, G15451A (G671S)/RDRP                                                                                   | EPI_ISL_455670            |               | Sub-cluster d         |
| 11      | A23403G (D614G)/S, C3037T (F106F)/NSP3, C241T/5'-UTR, C14408T (P323L)/RDRP, C13730T (A97V)/RDRP                                                                                    | EPI_ISL_455676            |               | Sub-cluster b         |
| 12      | A23403G (D614G)/S, C3037T (F106F)/NSP3, C241T/5'-UTR, C14408T (P323L)/RDRP, G4866T (S716I)/NSP3, C14425A (L329I)/RDRP                                                              | EPI_ISL_450788            |               | Sub-cluster c         |
| 13      | G11083T (L37F)/NSP6                                                                                                                                                                | EPI_ISL_454549            |               | A3 Clade              |
| 14      | G11083T (L37F)/NSP6, G1397A (V198I)/NSP2, G8653T (M33I)/NSP4, C884T (R27C)/NSP2                                                                                                    | EPI_ISL_435105            | Sub-cluster a |                       |
| 15      | G11083T (L37F)/NSP6, C28311T (P13L)/N, C23929T (Y789Y)/S, C13730T (A97V)/RDRP, C6312A (T1198K)/NSP3                                                                                | EPI_ISL_447586            | Sub-cluster b |                       |
| 16      | G11083T (L37F)/NSP6, C28311T (P13L)/N, C23929T (Y789Y)/S, C13730T (A97V)/RDRP, C6312A (T1198K)/NSP3, C6310A (S1197R)/NSP3                                                          | EPI_ISL_447569            | Sub-cluster b |                       |
| 17      | G11083T (L37F)/NSP6, C28311T (P13L)/N, C23929T (Y789Y)/S, C13730T (A97V)/RDRP, C6312A (T1198K)/NSP3, C6310A (S1197R)/NSP3, C1707T (S301F)/NSP2                                     | EPI_ISL_447855            | Sub-cluster b |                       |
| 18      | G11083T (L37F)/NSP6, C28311T (P13L)/N, C23929T (Y789Y)/S, C13730T (A97V)/RDRP, C6312A (T1198K)/NSP3, C6310A (S1197R)/NSP3, G1820A (G339S)/NSP2                                     | EPI_ISL_447862            | Sub-cluster b |                       |
| 19      | G11083T (L37F)/NSP6, C28311T (P13L)/N, C23929T (Y789Y)/S, C13730T (A97V)/RDRP, C6312A (T1198K)/NSP3, A6081G (D1121G)/NSP3                                                          | EPI_ISL_447847            | Sub-cluster b |                       |
| 20      | G11083T (L37F)/NSP6, C28311T (P13L)/N, C23929T (Y789Y)/S, C13730T (A97V)/RDRP, C6312A (T1198K)/NSP3, A21792T (K77M)/S                                                              | EPI_ISL_447571            | Sub-cluster b |                       |
| 21      | T28144C (L84S)/ORF8, C8782T (S76S)/NSP4                                                                                                                                            | EPI_ISL_455763            | B Clade       |                       |
| 22      | T28144C (L84S)/ORF8, C8782T (S76S)/NSP4, C4965T (T749I)/NSP3                                                                                                                       | EPI_ISL_455764            |               | Sub-cluster           |

**Supplementary Table 1:** List of accession numbers of 441 SARS-CoV-2 strains taken into mutational analysis.

| Region        | State          | Accession no.                                                                                                                                                                                                                                                                                                                                                                                                                                                                             | No of strains |
|---------------|----------------|-------------------------------------------------------------------------------------------------------------------------------------------------------------------------------------------------------------------------------------------------------------------------------------------------------------------------------------------------------------------------------------------------------------------------------------------------------------------------------------------|---------------|
| East India    | West Bengal    | EPI-ISL-455640 - EPI-ISL-455641, EPI-ISL-455644 - EPI-ISL-455676, EPI-ISL-455678 - EPI-ISL-455679                                                                                                                                                                                                                                                                                                                                                                                         | 37            |
|               | Odisha         | EPI-ISL-435088, EPI-ISL-455478, EPI-ISL-455749, EPI-ISL-455751 - EPI-ISL-455752, EPI-ISL-455754 - EPI-ISL-455755, EPI-ISL-455757 - EPI-ISL-455758, EPI-ISL-455760 - EPI-ISL-455761, EPI-ISL-455763 - EPI-ISL-455766, EPI-ISL-455767 - EPI-ISL-455768, EPI-ISL-455770 - EPI-ISL-455771, EPI-ISL-455775 - EPI-ISL-455780, EPI-ISL-455782 - EPI-ISL-455784, EPI-ISL-455786 - EPI-ISL-455787                                                                                                  | 30            |
|               | Bihar          | EPI-ISL-435112 , EPI-ISL-436417, EPI-ISL-436419, EPI-ISL-436439, EPI-ISL-436441, EPI-ISL-436449                                                                                                                                                                                                                                                                                                                                                                                           | 6             |
| Western India | Gujarat        | EPI-ISL-426414 - EPI-ISL-426415, EPI-ISL-435050 - EPI-ISL-435056, EPI-ISL-437438, EPI-ISL-437441- EPI-ISL-437442, EPI-ISL-437444 - EPI-ISL-437454, EPI-ISL-444456 - EPI-ISL-444486, EPI-ISL-447030 - EPI-ISL-447035, EPI-ISL-447037- EPI-ISL-447053, EPI-ISL-447534 - EPI-ISL-447555, EPI-ISL-450781 - EPI-ISL-450791, EPI-ISL-451149 - EPI-ISL-451156, EPI-ISL-451158 - EPI-ISL-451163, EPI-ISL-455015 - EPI-ISL-455027                                                                  | 139           |
|               | Maharastra     | EPI-ISL-436444, EPI-ISL-450321 - EPI-ISL-450325, EPI-ISL-452192 - EPI-ISL-452198, EPI-ISL-452201 - EPI-ISL-452203, EPI-ISL-452205, EPI-ISL-452207 - EPI-ISL-452217, EPI-ISL-454524 - EPI-ISL-454529, EPI-ISL-454531 - EPI-ISL-454534, EPI-ISL-454536 - EPI-ISL-454537, EPI-ISL-454540, EPI-ISL-454542- EPI-ISL-454543, EPI-ISL-454546 - EPI-ISL-454547, EPI-ISL-454549, EPI-ISL-454551 - EPI-ISL-454552, EPI-ISL-454556 - EPI-ISL-454557, EPI-ISL-454560, EPI-ISL-454563 - EPI-ISL-454570 | 59            |
| South India   | Tamilnadu      | EPI-ISL-435075, EPI-ISL-435078 - EPI-ISL-435080, EPI-ISL-435083- EPI-ISL-435084, EPI-ISL-435087, EPI-ISL-435091, EPI-ISL-435093, EPI-ISL-435094 - EPI-ISL-435096, EPI-ISL-436418, EPI-ISL-447584 - EPI-ISL-447587                                                                                                                                                                                                                                                                         | 17            |
|               | Telangana      | EPI-ISL-437626, EPI-ISL-438138, EPI-ISL-447847 - EPI-ISL-447866, EPI-ISL-447556 - EPI-ISL-447583, EPI-ISL-450326 - EPI-ISL-450331                                                                                                                                                                                                                                                                                                                                                         | 56            |
|               | Karnataka      | EPI-ISL-428479, EPI-ISL-428481 - EPI-ISL-428484, EPI-ISL-428486, EPI-ISL-428487, EPI-ISL-436137 - EPI-ISL-436141, EPI-ISL-436156, EPI-ISL-436157, EPI-ISL-436447                                                                                                                                                                                                                                                                                                                          | 15            |
|               | Kerala         | EPI-ISL-413522, EPI-ISL-413523                                                                                                                                                                                                                                                                                                                                                                                                                                                            | 2             |
| Central India | Madhya Pradesh | EPI-ISL-436453, EPI-ISL-436456, EPI-ISL-436457 - EPI-ISL-436463, EPI-ISL-452790 - EPI-ISL-452795                                                                                                                                                                                                                                                                                                                                                                                          | 15            |
| North India   | Delhi          | EPI-ISL-435061, EPI-ISL-435063 - EPI-ISL-435072, EPI-ISL-435108 - EPI-ISL-435110, EPI-ISL-436415, EPI-ISL-436424 - EPI-ISL-436426, EPI-ISL-436428 - EPI-ISL-436437, EPI-ISL-436445, EPI-ISL-436448, EPI-ISL-436450 - EPI-ISL-436452, EPI-ISL-436454 - EPI-ISL-436455                                                                                                                                                                                                                      | 34            |
|               | Haryana        | EPI-ISL-435076, EPI-ISL-454858 - EPI-ISL-454867                                                                                                                                                                                                                                                                                                                                                                                                                                           | 11            |
|               | Ladakh         | EPI-ISL-435101 - EPI-ISL-435106                                                                                                                                                                                                                                                                                                                                                                                                                                                           | 6             |
|               | Jammu/Kargil   | EPI-ISL-435090 , EPI-ISL-435107                                                                                                                                                                                                                                                                                                                                                                                                                                                           | 2             |
|               | Punjab         | EPI-ISL-435062                                                                                                                                                                                                                                                                                                                                                                                                                                                                            | 1             |
|               | Rajasthan      | EPI-ISL-436420, EPI-ISL-454830 - EPI-ISL-454833, EPI-ISL-455655                                                                                                                                                                                                                                                                                                                                                                                                                           | 6             |
|               | Uttar Pradesh  | EPI-ISL-435060, EPI-ISL-435082, EPI-ISL-435099, EPI-ISL-435100, EPI-ISL-436413                                                                                                                                                                                                                                                                                                                                                                                                            | 6             |
